# Supplementary material for: Host markers in Quantiferon supernatants differentiate active TB from latent TB infection: preliminary report
Source: BMC Pulm Med. 2009 May 16;9:21. doi: 10.1186/1471-2466-9-21 (PMC2696407; doi:10.1186/1471-2466-9-21)
Supplement: Additional file 2 — Abilities of combinations of analytes in SVM models to discriminate between positive QFT results. The data provides information on the performances of combinations of markers in support vector machine (SVM) models in discriminating between positive QFT results as either pulmonary TB or LTBI. TB = pulmonary TB, LTBI = household contact with a positive QFT and TST result. [file 1471-2466-9-21-S2.xls]

## Sheet: Sheet1
Supplementary table 2: Performances of combinations of markers in support vector machine models in diagnosing pulmonary TB or LTBI in QFT positive pulmonary TB cases (n=22) and household contacts (n=25). SVM= Support vector machine analysis, TB=pulmonary TB, LTBI=household contact with a positive QFT and TST result.
Biomarkers in SVM model	Model misclassification	Model accuracy, %	Leave-one-out cross validation misclassification	Leave-one-out cross validation accuracy, %	Predicted TB, %	Predicted LTBI,%
EGFNil, EGFAg-Nil, MIP-1βAg-Nil	10.6	86.9	10.6	86.9	90.9	88
EGFNil, EGFAg, MIP-1βAg-Nil	8.5	90.5	12.7	81.4	90.9	84
EGFNil, IL-1αNil, MIP-1βAg-Nil	8.5	90.4	12.7	85.8	86.4	88
EGFNil, EGFAg, sCD40LAg-Nil	10.6	86.9	19.1	79.4	81.8	80
EGFNil, EGFAg-Nil, VEGFAg	10.6	86.9	14.9	83.2	86.36	84
EGFNil, TGF-αAg-Nil, IFN-γAg	10.6	86.6	19.1	79.4	81.8	80
EGFNil, TGF-αAg-Nil, IFN-γAg-Nil	1036	86.9	19.1	79.4	81.8	80
EGFNil, IL-1αAg, sCD40LAg	10.6	86.9	17	81.1	81.8	84
EGFNil, IFN-γAg, MIP-1βNil	10.6	86.6	21.3	76.5	77.3	80
EGFNil, IFN-γAg, VEGFAg	10.6	86.9	12.8	85.8	86.4	88
