# Supplementary material for: Host markers in Quantiferon supernatants differentiate active TB from latent TB infection: preliminary report
Source: BMC Pulm Med. 2009 May 16;9:21. doi: 10.1186/1471-2466-9-21 (PMC2696407; doi:10.1186/1471-2466-9-21)
Supplement: Additional file 3 — Abilities of combinations of analytes in GDA models to discriminate between all TB cases and household contacts. The data provides information on the ability of combinations of analytes in general discriminant analysis (GDA) models to discriminate between pulmonary TB cases and household contacts, irrespective of QFT results. [file 1471-2466-9-21-S3.xls]

## Sheet: Sheet1
Supplementary table 3: General discriminant analysis: ability of marker combinations to discriminate between pulmonary TB cases and household contacts, irrespective of QFT results. In each case, effect df =1, error df = 53
Biomarkers in GDA model	% of 23 TB cases correctly classified		% of 34 HHCs correctly classified
	Resubstitution Classification matrix	Leave-one-out cross validation	Resubstitution Classification matrix	Leave-one-out cross validation	Wilks lambda value	f	p value
EGFAg, EGFAg-Nil,IL-1αNil	87	87	91.2	91.2	0.293158	127.8	<0.0001
EGFAg, EGFAg-Nil, IL-1αAg	87	87	91.2	91.2	0.29658	125.704	<0.0001
IL-1αAg, IL-1αAg-Nil, sCD40LNil	82.6	82.6	94.1	91.2	0.484564	56.3766	<0.0001
IL-1αNil, IL-1αAg-Nil, sCD40LNil	82.6	82.6	94.1	91.2	0.484564	56.3766	<0.0001
EGFNil, EGFAg-Nil, IL-1αAg	87	87	91.2	91.2	0.29658	125.704	<0.0001
IL-1αNil, IL-1αAg, sCD40LNil	82.6	82.6	94.1	91.2	0.484564	56.3766	<0.0001
EGFAg-Nil, TGF-αAg-Nil, TNF-αAg-Nil	95.7	82.6	85.3	85.3	0.411363	75.84	<0.0001
EGFNil, EGFAg, MIP-1βAg-Nil	87	87	91.2	88.3	0.465818	60.7783	<0.0001
EGFNil, EGFAg-Nil, MIP-1βAg-Nil	87	87	91.2	88.3	0.465818	60.7783	<0.0001
EGFNil, EGFAg, IL-1αAg	87	87	91.2	91.2	0.29658	125.704	<0.0001
EGFNil, EGFAg-Nil, IL-1αNil	87	87	91.2	91.2	0.293158	127.79	<0.0001
EGFAg, EGFAg-Nil, MIP-1βAg-Nil	87	87	91.2	88.3	0.465818	60.7783	<0.0001
EGFAg-Nil, TGF-αAg-Nil, MIP-1βNil	87	82.6	91.2	88.3	0.518201	49.2768	<0.0001
EGFNil, EGFAg, IL-1αNil	87	87	91.2	91.2	0.293158	127.79	<0.0001
EGFAg-Nil, TGF-αAg-Nil, IL-1αAg	87	82.6	91.2	88.3	0.375558	88.1232	<0.0001
